# Supplementary material for: Patients’ and health professionals’ attitudes and perceptions towards the initiation of preventive drugs for primary prevention of cardiovascular disease: protocol for a systematic review of qualitative studies
Source: PubMed Central journal article supplement — BMJ Open. 2019 Apr 11;9(4):e025587. doi: 10.1136/bmjopen-2018-025587 (PMC6500290; doi:10.1136/bmjopen-2018-025587), 2019-04-11
Supplement: bmjopen-2018-025587supp001.pdf [file bmjopen-2018-025587supp001.pdf]

## APPENDICES

### Appendix 1. Medline search strategy

#### *Search term*

|    |                                                                                                                                                                                                                                                                                    |
|----|------------------------------------------------------------------------------------------------------------------------------------------------------------------------------------------------------------------------------------------------------------------------------------|
| 1  | Health personnel.mp.                                                                                                                                                                                                                                                               |
| 2  | Doctor*.mp.                                                                                                                                                                                                                                                                        |
| 3  | Healthcare professional*.mp.                                                                                                                                                                                                                                                       |
| 4  | GENERAL PRACTITIONERS/ or FAMILY NURSE PRACTITIONERS/ or NURSE PRACTITIONERS/ or Practitioner*.mp.                                                                                                                                                                                 |
| 5  | Physician*.mp.                                                                                                                                                                                                                                                                     |
| 6  | Prescriber*.mp.                                                                                                                                                                                                                                                                    |
| 7  | Patient*.mp.                                                                                                                                                                                                                                                                       |
| 8  | General Practice.mp. or General Practice/                                                                                                                                                                                                                                          |
| 9  | Primary Health Care.mp. or Primary Health Care/                                                                                                                                                                                                                                    |
| 10 | 1 or 2 or 3 or 4 or 5 or 6 or 7 or 8 or 9                                                                                                                                                                                                                                          |
| 11 | (Prescrib* adj2 (lipid lowering drug* or Statin* or Ezetimibe or Blood pressure lowering drug* or Antihypertensive drug* or Angiotensin Converting Enzyme Inhibitor or ACE or Angiotensin Receptor Blocker or ARB or Calcium Channel Blocker* or Beta Blocker* or variation*)).mp. |
| 12 | ((Drug or medication) adj2 (start* or tak* or receiv* or initiation or utilization or prescrib* or choice)).mp.                                                                                                                                                                    |
| 13 | Decision making.mp. or Decision Making/                                                                                                                                                                                                                                            |
| 14 | Preventive drug*.mp.                                                                                                                                                                                                                                                               |
| 15 | Preventive therap*.mp.                                                                                                                                                                                                                                                             |
| 16 | Antihypertensive Agents/tu [Therapeutic Use]                                                                                                                                                                                                                                       |
| 17 | Hydroxymethylglutaryl-CoA Reductase Inhibitors/tu [Therapeutic Use]                                                                                                                                                                                                                |
| 18 | Statin*.mp.                                                                                                                                                                                                                                                                        |
| 19 | Practice Patterns, Physicians/                                                                                                                                                                                                                                                     |
| 20 | Physician-Patient Relations/                                                                                                                                                                                                                                                       |
| 21 | (Preventive adj2 (drug* or therap* or treatment* or medication)).mp.                                                                                                                                                                                                               |
| 22 | Preventive Medicine/mt [Methods]                                                                                                                                                                                                                                                   |
| 23 | 11 or 12 or 13 or 14 or 15 or 16 or 17 or 18 or 19 or 20 or 21 or 22                                                                                                                                                                                                               |
| 24 | Cardiovascular Diseases/dt, pc [Drug Therapy, Prevention & Control]                                                                                                                                                                                                                |
| 25 | (Cardiovascular adj3 primary prevention).mp.                                                                                                                                                                                                                                       |
| 26 | (Cardiovascular preventive adj2 (drug* or therap* or treatment* or medication)).mp.                                                                                                                                                                                                |
| 27 | 24 or 25 or 26                                                                                                                                                                                                                                                                     |
| 28 | 10 and 23 and 27                                                                                                                                                                                                                                                                   |
| 29 | limit 28 to "qualitative (best balance of sensitivity and specificity)"                                                                                                                                                                                                            |
| 30 | Qualitative.mp.                                                                                                                                                                                                                                                                    |
| 31 | Mixed methods.mp.                                                                                                                                                                                                                                                                  |
| 32 | Focus Groups*.mp.                                                                                                                                                                                                                                                                  |
| 33 | Interview*.mp.                                                                                                                                                                                                                                                                     |
| 34 | "Surveys and Questionnaires"/                                                                                                                                                                                                                                                      |
| 35 | Nursing Methodology Research/                                                                                                                                                                                                                                                      |
| 36 | 30 or 31 or 32 or 33 or 34 or 35                                                                                                                                                                                                                                                   |
| 37 | "Attitude of Health Personnel"/                                                                                                                                                                                                                                                    |
| 38 | Attitude to Health/                                                                                                                                                                                                                                                                |
| 39 | Attitude*.mp.                                                                                                                                                                                                                                                                      |
| 40 | Perception*.mp.                                                                                                                                                                                                                                                                    |
| 41 | Prespective*.mp.                                                                                                                                                                                                                                                                   |
| 42 | Behavio?r.mp.                                                                                                                                                                                                                                                                      |
| 43 | View*.mp.                                                                                                                                                                                                                                                                          |

|    |                                                          |
|----|----------------------------------------------------------|
| 44 | Experience*.mp.                                          |
| 45 | Expectation*.mp.                                         |
| 46 | Belie*.mp.                                               |
| 47 | 37 or 38 or 39 or 40 or 41 or 42 or 43 or 44 or 45 or 46 |
| 48 | 36 or 47                                                 |
| 49 | 28 and 48                                                |
| 50 | 29 or 49                                                 |

## Appendix 2. Inclusion/exclusion form for study selection

|                                                 | Include                                                                                                                                                                                                                                                                                                                                                 | Yes                      | No                       | Unclear                  | Exclude                                                                                                                                                                                                                                                                                                                                                                                                                                                                                                                                                       |
|-------------------------------------------------|---------------------------------------------------------------------------------------------------------------------------------------------------------------------------------------------------------------------------------------------------------------------------------------------------------------------------------------------------------|--------------------------|--------------------------|--------------------------|---------------------------------------------------------------------------------------------------------------------------------------------------------------------------------------------------------------------------------------------------------------------------------------------------------------------------------------------------------------------------------------------------------------------------------------------------------------------------------------------------------------------------------------------------------------|
| <b>Research type</b>                            | <ul style="list-style-type: none"> <li>▪ Qualitative study, standalone <input type="checkbox"/></li> <li>▪ Qualitative study in the context of mixed method <input type="checkbox"/></li> <li>▪ Review of qualitative studies <input type="checkbox"/></li> <li>▪ Other, specify: <input type="checkbox"/></li> </ul>                                   | <input type="checkbox"/> | <input type="checkbox"/> | <input type="checkbox"/> | <ul style="list-style-type: none"> <li>▪ Quantitative study <input type="checkbox"/></li> <li>▪ Clearly commentary/letter with no data from primary studies <input type="checkbox"/></li> <li>▪ Other, specify: <input type="checkbox"/></li> </ul>                                                                                                                                                                                                                                                                                                           |
| If clearly excluded on study design – STOP HERE |                                                                                                                                                                                                                                                                                                                                                         |                          |                          |                          |                                                                                                                                                                                                                                                                                                                                                                                                                                                                                                                                                               |
| <b>Sample</b>                                   | <ul style="list-style-type: none"> <li>▪ Primary care Health professionals <input type="checkbox"/></li> <li>- General practitioner <input type="checkbox"/></li> <li>- Nurse practitioner <input type="checkbox"/></li> <li>- Other, specify: <input type="checkbox"/></li> <li>▪ Patients treated in primary care <input type="checkbox"/></li> </ul> | <input type="checkbox"/> | <input type="checkbox"/> | <input type="checkbox"/> | <ul style="list-style-type: none"> <li>▪ Secondary or tertiary care health professionals <input type="checkbox"/></li> <li>▪ Patients treated in Secondary or tertiary care <input type="checkbox"/></li> </ul>                                                                                                                                                                                                                                                                                                                                               |
| <b>Phenomenon of Interest</b>                   | <ul style="list-style-type: none"> <li>▪ Lipid lowering drugs initiation or prescription <input type="checkbox"/></li> <li>▪ Antihypertensive drugs initiation or prescription <input type="checkbox"/></li> <li>▪ Drug initiation or prescription for primary prevention of CVD <input type="checkbox"/></li> </ul>                                    | <input type="checkbox"/> | <input type="checkbox"/> | <input type="checkbox"/> | <ul style="list-style-type: none"> <li>▪ Initiation or prescription of: <input type="checkbox"/></li> <li>- Aspirin <input type="checkbox"/></li> <li>- Fibrates <input type="checkbox"/></li> <li>- Niacin <input type="checkbox"/></li> <li>- Bile acid sequestrants <input type="checkbox"/></li> <li>- Omega-3 fatty acid compounds <input type="checkbox"/></li> <li>▪ Adherence to medication <input type="checkbox"/></li> <li>▪ Discontinuation of medication <input type="checkbox"/></li> <li>▪ Other, specify: <input type="checkbox"/></li> </ul> |
| <b>Design</b>                                   | <ul style="list-style-type: none"> <li>▪ Qualitative data collection, specify: <input type="checkbox"/></li> <li>▪ Qualitative data analysis, specify: <input type="checkbox"/></li> </ul>                                                                                                                                                              | <input type="checkbox"/> | <input type="checkbox"/> | <input type="checkbox"/> | <ul style="list-style-type: none"> <li>▪ Quantitative data collection or analysis with no qualitative component <input type="checkbox"/></li> </ul>                                                                                                                                                                                                                                                                                                                                                                                                           |
| <b>Evaluation</b>                               | <ul style="list-style-type: none"> <li>▪ Attitudes, perceptions, views, experiences, patient or health <input type="checkbox"/></li> </ul>                                                                                                                                                                                                              | <input type="checkbox"/> | <input type="checkbox"/> | <input type="checkbox"/> | <ul style="list-style-type: none"> <li>▪ Attitudes, perceptions, views, experiences, <input type="checkbox"/></li> </ul>                                                                                                                                                                                                                                                                                                                                                                                                                                      |

|                                                  |                                                                                                                                           |                                                                                                                                                                                                                                                                                                                                             |
|--------------------------------------------------|-------------------------------------------------------------------------------------------------------------------------------------------|---------------------------------------------------------------------------------------------------------------------------------------------------------------------------------------------------------------------------------------------------------------------------------------------------------------------------------------------|
|                                                  | <p>professional related<br/>Factors influencing<br/>cardiovascular drug<br/>initiation or<br/>prescription for<br/>primary prevention</p> | <p>patient or health<br/>professional related<br/>factors influencing<br/>cardiovascular drug<br/>initiation or<br/>prescription for<br/>secondary<br/>prevention</p> <ul style="list-style-type: none"> <li>▪ Factors influencing<br/>drug adherence or<br/>discontinuation <input type="checkbox"/></li> <li>▪ Other, specify:</li> </ul> |
| <p>If "NO" in any of the categories, exclude</p> |                                                                                                                                           |                                                                                                                                                                                                                                                                                                                                             |
| <p>Comments</p>                                  |                                                                                                                                           |                                                                                                                                                                                                                                                                                                                                             |

### Appendix 3. Data collection form

|                                                 |                                                                               |                                                                                                                                  |
|-------------------------------------------------|-------------------------------------------------------------------------------|----------------------------------------------------------------------------------------------------------------------------------|
| <b>Reviewer name (collecting data)</b>          |                                                                               |                                                                                                                                  |
| <b>Data collection date</b>                     | Click or tap to enter a date.                                                 |                                                                                                                                  |
| <b>Reviewer name (reviewing collected data)</b> |                                                                               |                                                                                                                                  |
| <b>Data review date</b>                         | Click or tap to enter a date.                                                 |                                                                                                                                  |
| <b>Amendments</b>                               |                                                                               |                                                                                                                                  |
| <b>Date of amendment</b>                        | Click or tap to enter a date.                                                 |                                                                                                                                  |
| <b>Notes</b>                                    |                                                                               |                                                                                                                                  |
| <b>Study Bibliographic details</b>              |                                                                               |                                                                                                                                  |
| <b>First author</b>                             |                                                                               |                                                                                                                                  |
| <b>Publication date</b>                         | Click or tap to enter a date.                                                 |                                                                                                                                  |
| <b>Country</b>                                  |                                                                               |                                                                                                                                  |
| <b>Study characteristics</b>                    |                                                                               |                                                                                                                                  |
| <b>Study type</b>                               | <input type="checkbox"/> Qualitative<br><input type="checkbox"/> Mixed method |                                                                                                                                  |
| <b>Study aim</b>                                | What was the purpose or aim of the study                                      |                                                                                                                                  |
| <b>Theoretical approach</b>                     | What theoretical perspective is the study based on?                           |                                                                                                                                  |
| <b>Setting</b>                                  | What is the geographical location and setting of the study?                   |                                                                                                                                  |
| <b>Participants</b>                             |                                                                               |                                                                                                                                  |
| <b>Type of participants</b>                     | Who was included in the study                                                 | <input type="checkbox"/> Patient<br><input type="checkbox"/> General practitioner<br><input type="checkbox"/> Nurse practitioner |
| <b>Recruitment</b>                              | How were participants recruited?                                              |                                                                                                                                  |
| <b>Participants excluded</b>                    | Were there any participants excluded?                                         | <input type="checkbox"/> Yes<br><input type="checkbox"/> No                                                                      |
|                                                 | Reason of exclusion:                                                          |                                                                                                                                  |
| <b>Total number of participants</b>             |                                                                               |                                                                                                                                  |

|                                                 |                                                                  |                                                                                                                                                                                           |
|-------------------------------------------------|------------------------------------------------------------------|-------------------------------------------------------------------------------------------------------------------------------------------------------------------------------------------|
| <b>Number of males</b>                          |                                                                  |                                                                                                                                                                                           |
| <b>Number of females</b>                        |                                                                  |                                                                                                                                                                                           |
| <b>Age of participants</b>                      |                                                                  |                                                                                                                                                                                           |
| <b>Methods</b>                                  |                                                                  |                                                                                                                                                                                           |
| <b>Method of data collection</b>                | How was data collected?                                          | <input type="checkbox"/> Interview<br><input type="checkbox"/> Survey<br><input type="checkbox"/> Questionnaire<br><input type="checkbox"/> Focus group<br><input type="checkbox"/> Other |
| <b>Additional details about data collection</b> |                                                                  |                                                                                                                                                                                           |
| <b>Data collection duration</b>                 | What is the start and end date of the data collection?           |                                                                                                                                                                                           |
| <b>Method of data analysis</b>                  | How was the data analysed?                                       |                                                                                                                                                                                           |
| <b>Additional details about data analysis</b>   |                                                                  |                                                                                                                                                                                           |
| <b>Findings</b>                                 |                                                                  |                                                                                                                                                                                           |
| <b>Main findings</b>                            | What are the main findings of the study?                         |                                                                                                                                                                                           |
| <b>Descriptive themes</b>                       | What descriptive themes were reported?                           |                                                                                                                                                                                           |
| <b>Author interpretation</b>                    | What are the interpretations of results provided by the authors? |                                                                                                                                                                                           |
| <b>Study strengths and weakness</b>             | What are the key strengths and weaknesses of the study?          |                                                                                                                                                                                           |
